# Supplementary material for: Formation of 2- and 1-methyl-1,4-dihydronaphthalene isomers via the crossed beam reactions of phenyl radicals (C6H5) with isoprene (CH2C(CH3)CHCH2) and 1,3-pentadiene (CH2CHCHCHCH3)
Source: Royal Society of Chemistry journal article supplement (doi:10.1039/c4cp04612a), 2014-11-07
Supplement: c4cp04612a1.pdf [file c4cp04612a1.pdf]

## Supporting Information

for

**Formation of 2- and 1-Methyl-1,4-Dihydronaphthalene Isomers via  
the Crossed Beam Reactions of Phenyl Radicals ( $C_6H_5$ ) with  
Isoprene ( $CH_2C(CH_3)CHCH_2$ ) and 1,3-Pentadiene  
( $CH_2CHCHCHCH_3$ )**

By

Tao Yang, Lloyd Muzangwa, Dorian S. N. Parker, Ralf I. Kaiser\*

*Department of Chemistry, University of Hawaii at Manoa, Honolulu, HI 96822*

Alexander M. Mebel\*

*Department of Chemistry and Biochemistry, Florida International University, Miami, Florida*

List of Contents:

Table S1. RRKM calculated energy-dependent rate constants ( $s^{-1}$ ) for unimolecular reaction steps in the reaction systems of phenyl with isoprene and 1,3-pentadiene at different collision energies.....3

(a) p-tolyl + isoprene

| From       | To                                                   | Collision Energy, kJ mol <sup>-1</sup> |          |          |          |          |          |          |          |  |
|------------|------------------------------------------------------|----------------------------------------|----------|----------|----------|----------|----------|----------|----------|--|
|            |                                                      | 0                                      | 10       | 20       | 30       | 40       | 50       | 55       | 60       |  |
| <b>i0</b>  | <b>i1</b>                                            | 1.21E+09                               | 3.22E+09 | 4.16E+09 | 4.75E+09 | 5.18E+09 | 5.52E+09 | 5.66E+09 | 5.79E+09 |  |
| <b>i1</b>  | <b>i0</b>                                            | 4.00E-06                               | 8.72E-04 | 1.81E-02 | 1.72E-01 | 1.06E+00 | 4.88E+00 | 9.68E+00 | 1.83E+01 |  |
| <b>i0</b>  | <b>i2</b>                                            | 1.94E+01                               | 5.04E+05 | 6.58E+06 | 1.74E+07 | 3.09E+07 | 4.60E+07 | 5.38E+07 | 6.19E+07 |  |
| <b>i2</b>  | <b>i0</b>                                            | 4.47E-10                               | 7.49E-04 | 1.25E-01 | 2.23E+00 | 1.82E+01 | 9.77E+01 | 2.02E+02 | 3.96E+02 |  |
| <b>i0</b>  | <b>i4</b>                                            | 1.05E+10                               | 1.45E+10 | 1.60E+10 | 1.68E+10 | 1.74E+10 | 1.79E+10 | 1.81E+10 | 1.83E+10 |  |
| <b>i4</b>  | <b>i0</b>                                            | 1.92E-05                               | 2.25E-03 | 4.13E-02 | 3.73E-01 | 2.24E+00 | 1.03E+01 | 2.03E+01 | 3.85E+01 |  |
| <b>i0</b>  | <b>i3</b>                                            | 1.56E-02                               | 2.37E+02 | 1.34E+05 | 8.05E+05 | 2.08E+06 | 3.89E+06 | 4.98E+06 | 6.17E+06 |  |
| <b>i3</b>  | <b>i0</b>                                            | 8.84E-12                               | 7.82E-06 | 5.38E-02 | 2.06E+00 | 2.34E+01 | 1.50E+02 | 3.33E+02 | 6.87E+02 |  |
| <b>i0</b>  | CH <sub>2</sub> C(CH <sub>3</sub> )CCH <sub>2</sub>  | 1.20E+06                               | 1.68E+06 | 2.74E+06 | 4.81E+06 | 8.61E+06 | 1.48E+07 | 1.90E+07 | 2.40E+07 |  |
| <b>i0</b>  | CH <sub>2</sub> CHC(CH <sub>3</sub> )CH              | 8.04E+04                               | 1.07E+05 | 1.69E+05 | 2.93E+05 | 5.57E+05 | 1.11E+06 | 1.57E+06 | 2.17E+06 |  |
| <b>i0</b>  | CH <sub>2</sub> C(CH <sub>3</sub> )CHCH              | 3.40E+04                               | 4.16E+04 | 6.24E+04 | 1.03E+05 | 1.89E+05 | 3.73E+05 | 5.25E+05 | 7.34E+05 |  |
| <b>i0</b>  | CH <sub>2</sub> C(CH <sub>2</sub> )CHCH <sub>2</sub> | 3.35E+07                               | 5.45E+07 | 1.12E+08 | 2.11E+08 | 3.44E+08 | 5.05E+08 | 5.96E+08 | 6.92E+08 |  |
| <b>i1</b>  | <b>i5</b>                                            | 2.81E+10                               | 3.50E+10 | 4.28E+10 | 5.17E+10 | 6.15E+10 | 7.24E+10 | 7.82E+10 | 8.43E+10 |  |
| <b>i5</b>  | <b>i1</b>                                            | 1.92E+10                               | 2.39E+10 | 2.91E+10 | 3.52E+10 | 4.16E+10 | 4.89E+10 | 5.27E+10 | 5.68E+10 |  |
| <b>i1</b>  | <b>i2</b>                                            | 1.69E+02                               | 3.81E+02 | 7.89E+02 | 1.52E+03 | 2.77E+03 | 4.77E+03 | 6.16E+03 | 7.88E+03 |  |
| <b>i2</b>  | <b>i1</b>                                            | 1.19E+06                               | 2.09E+06 | 3.44E+06 | 4.92E+06 | 7.99E+06 | 1.14E+07 | 1.35E+07 | 1.59E+07 |  |
| <b>i1</b>  | <b>i7</b>                                            | 1.82E-04                               | 1.40E-03 | 7.21E-03 | 2.87E-02 | 9.47E-02 | 2.71E-01 | 4.38E-01 | 6.91E-01 |  |
| <b>i7</b>  | <b>i1</b>                                            | 7.49E+03                               | 4.09E+04 | 1.55E+05 | 4.63E+05 | 1.17E+06 | 2.62E+06 | 3.80E+06 | 5.32E+06 |  |
| <b>i1</b>  | <b>p1</b>                                            | 2.16E-02                               | 1.90E-01 | 1.11E+00 | 4.91E+00 | 1.78E+01 | 5.53E+01 | 9.30E+01 | 1.52E+02 |  |
| <b>i5</b>  | <b>i6</b>                                            | 2.89E+04                               | 4.77E+04 | 7.54E+04 | 1.14E+05 | 1.68E+05 | 2.39E+05 | 2.83E+05 | 3.32E+05 |  |
| <b>i6</b>  | <b>i5</b>                                            | 3.70E+07                               | 6.16E+07 | 9.78E+07 | 1.49E+08 | 2.20E+08 | 3.16E+08 | 3.74E+08 | 4.41E+08 |  |
| <b>i5</b>  | <b>p2</b>                                            | 3.32E-04                               | 6.65E-03 | 6.30E-02 | 3.90E-01 | 1.81E+00 | 6.85E+00 | 1.25E+01 | 2.21E+01 |  |
| <b>i6</b>  | <b>p3</b>                                            | 5.23E+05                               | 1.12E+06 | 2.23E+06 | 4.15E+06 | 7.32E+06 | 1.23E+07 | 1.57E+07 | 1.99E+07 |  |
| <b>i2</b>  | <b>p4</b>                                            | 5.83E-04                               | 2.83E-02 | 4.10E-01 | 3.12E+00 | 1.61E+01 | 6.41E+01 | 1.19E+02 | 2.10E+02 |  |
| <b>i2</b>  | <b>p6</b>                                            | 1.67E-04                               | 1.35E-01 | 3.72E+00 | 3.75E+01 | 2.27E+02 | 9.96E+02 | 1.91E+03 | 3.50E+03 |  |
| <b>i7</b>  | <b>p5</b>                                            | 2.78E+03                               | 1.45E+04 | 5.48E+04 | 1.66E+05 | 4.27E+05 | 9.75E+05 | 1.42E+06 | 2.02E+06 |  |
| <b>i4</b>  | <b>i8</b>                                            | 2.56E+09                               | 3.33E+09 | 4.24E+09 | 5.32E+09 | 6.56E+09 | 7.98E+09 | 8.76E+09 | 9.59E+09 |  |
| <b>i8</b>  | <b>i4</b>                                            | 4.72E+09                               | 6.15E+09 | 7.87E+09 | 9.88E+09 | 1.22E+10 | 1.49E+10 | 1.64E+10 | 1.79E+10 |  |
| <b>i4</b>  | <b>i3</b>                                            | 7.41E+02                               | 1.60E+03 | 3.10E+03 | 6.01E+03 | 1.07E+04 | 1.81E+04 | 2.32E+04 | 2.94E+04 |  |
| <b>i3</b>  | <b>i4</b>                                            | 2.27E+08                               | 3.45E+08 | 5.18E+08 | 6.93E+08 | 9.32E+08 | 1.22E+09 | 1.38E+09 | 1.55E+09 |  |
| <b>i4</b>  | <b>i10</b>                                           | 1.04E-06                               | 1.79E-05 | 1.49E-04 | 8.31E-04 | 3.55E-03 | 1.25E-02 | 2.22E-02 | 3.82E-02 |  |
| <b>i10</b> | <b>i4</b>                                            | 6.90E+01                               | 8.16E+02 | 4.83E+03 | 1.96E+04 | 6.28E+04 | 1.69E+05 | 2.63E+05 | 3.99E+05 |  |
| <b>i4</b>  | <b>p7</b>                                            | 1.01E-04                               | 1.16E-03 | 8.38E-03 | 4.36E-02 | 1.79E-01 | 6.16E-01 | 1.08E+00 | 1.84E+00 |  |
| <b>i8</b>  | <b>i9</b>                                            | 7.51E+04                               | 1.26E+05 | 2.02E+05 | 3.11E+05 | 4.63E+05 | 6.70E+05 | 7.86E+05 | 9.21E+05 |  |
| <b>i9</b>  | <b>i8</b>                                            | 5.16E+07                               | 8.37E+07 | 1.30E+08 | 1.95E+08 | 2.82E+08 | 3.98E+08 | 4.68E+08 | 5.48E+08 |  |
| <b>i8</b>  | <b>p8</b>                                            | 3.70E-05                               | 1.30E-03 | 1.64E-02 | 1.22E-01 | 6.54E-01 | 2.76E+00 | 5.31E+00 | 9.80E+00 |  |
| <b>i9</b>  | <b>p3</b>                                            | 4.79E+05                               | 1.03E+06 | 2.06E+06 | 3.85E+06 | 6.82E+06 | 1.15E+07 | 1.47E+07 | 1.87E+07 |  |

|            |            |          |          |          |          |          |          |          |          |
|------------|------------|----------|----------|----------|----------|----------|----------|----------|----------|
| <b>i3</b>  | <b>p9</b>  | 1.49E+00 | 3.51E+01 | 3.21E+02 | 1.80E+03 | 7.40E+03 | 2.45E+04 | 4.18E+04 | 6.90E+04 |
| <b>i3</b>  | <b>p11</b> | 5.52E-13 | 3.81E-08 | 1.13E-03 | 1.50E-01 | 2.76E+00 | 2.36E+01 | 5.80E+01 | 1.31E+02 |
| <b>i10</b> | <b>p10</b> | 1.97E+03 | 1.08E+04 | 4.20E+04 | 1.30E+05 | 3.42E+05 | 7.92E+05 | 1.16E+06 | 1.67E+06 |

(b) p-tolyl + 1,3-pentadiene

|             |                                         | Collision Energy, kJ mol <sup>-1</sup> |          |          |          |          |          |          |          |
|-------------|-----------------------------------------|----------------------------------------|----------|----------|----------|----------|----------|----------|----------|
| From        | To                                      | 0                                      | 10       | 20       | 30       | 40       | 50       | 55       | 60       |
| <b>i0'</b>  | <b>i1'</b>                              | 1.62E+09                               | 5.89E+09 | 7.86E+09 | 9.07E+09 | 9.91E+09 | 1.06E+10 | 1.08E+10 | 1.11E+10 |
| <b>i1'</b>  | <b>i0'</b>                              | 1.40E-06                               | 8.17E-04 | 2.21E-02 | 2.40E-01 | 1.61E+00 | 7.96E+00 | 1.62E+01 | 3.16E+01 |
| <b>i0'</b>  | <b>i2'</b>                              | 2.46E-01                               | 1.36E+04 | 2.23E+06 | 9.66E+06 | 2.11E+07 | 3.54E+07 | 4.33E+07 | 5.17E+07 |
| <b>i2'</b>  | <b>i0'</b>                              | 5.19E-13                               | 4.06E-06 | 1.05E-02 | 3.38E-01 | 3.64E+00 | 2.30E+01 | 5.08E+01 | 1.05E+02 |
| <b>i0'</b>  | <b>i4'</b>                              | 3.03E+07                               | 3.70E+08 | 6.28E+08 | 8.08E+08 | 9.47E+08 | 1.06E+09 | 1.11E+09 | 1.16E+09 |
| <b>i4'</b>  | <b>i0'</b>                              | 3.85E-07                               | 7.24E-04 | 2.44E-02 | 2.90E-01 | 2.05E+00 | 1.04E+01 | 2.15E+01 | 4.22E+01 |
| <b>i0'</b>  | <b>i3'</b>                              | 1.07E+01                               | 3.19E+05 | 8.56E+06 | 2.65E+07 | 4.96E+07 | 7.56E+07 | 8.93E+07 | 1.03E+08 |
| <b>i3'</b>  | <b>i0'</b>                              | 2.34E-11                               | 1.02E-04 | 4.30E-02 | 9.90E-01 | 9.15E+00 | 5.27E+01 | 1.12E+02 | 2.25E+02 |
| <b>i0'</b>  | CH <sub>3</sub> CHCHCCH <sub>2</sub>    | 1.37E+06                               | 1.65E+06 | 2.60E+06 | 4.49E+06 | 7.99E+06 | 1.37E+07 | 1.75E+07 | 2.20E+07 |
| <b>i0'</b>  | CH <sub>3</sub> CHCCHCH <sub>2</sub>    | 2.14E+06                               | 2.60E+06 | 4.06E+06 | 6.91E+06 | 1.21E+07 | 2.04E+07 | 2.60E+07 | 3.26E+07 |
| <b>i0'</b>  | CH <sub>3</sub> CCHCHCH <sub>2</sub>    | 2.49E+06                               | 3.04E+06 | 4.80E+06 | 8.25E+06 | 1.46E+07 | 2.50E+07 | 3.20E+07 | 4.03E+07 |
| <b>i0'</b>  | CH <sub>3</sub> CHCHCHCH                | 7.02E+04                               | 7.78E+04 | 1.16E+05 | 1.95E+05 | 3.64E+05 | 7.11E+05 | 9.86E+05 | 1.35E+06 |
| <b>i0'</b>  | CH <sub>2</sub> CHCHCHCHCH <sub>2</sub> | 8.34E+06                               | 2.29E+07 | 9.36E+07 | 2.37E+08 | 4.33E+08 | 6.67E+08 | 7.95E+08 | 9.29E+08 |
| <b>i1'</b>  | <b>i5'</b>                              | 1.14E+10                               | 1.47E+10 | 1.86E+10 | 2.31E+10 | 2.83E+10 | 3.42E+10 | 3.74E+10 | 4.08E+10 |
| <b>i5'</b>  | <b>i1'</b>                              | 3.62E+09                               | 4.67E+09 | 5.93E+09 | 7.37E+09 | 9.05E+09 | 1.11E+10 | 1.20E+10 | 1.31E+10 |
| <b>i1'</b>  | <b>i2'</b>                              | 2.11E+02                               | 5.02E+02 | 1.09E+03 | 2.19E+03 | 4.12E+03 | 7.34E+03 | 9.63E+03 | 1.24E+04 |
| <b>i2'</b>  | <b>i1'</b>                              | 5.99E+05                               | 1.08E+06 | 1.82E+06 | 2.89E+06 | 4.37E+06 | 6.35E+06 | 7.55E+06 | 8.92E+06 |
| <b>i1'</b>  | <b>i7'</b>                              | 2.46E-07                               | 7.67E-06 | 8.16E-05 | 5.25E-04 | 2.47E-03 | 9.37E-03 | 1.71E-02 | 3.01E-02 |
| <b>i7'</b>  | <b>i1'</b>                              | 1.30E+01                               | 2.77E+02 | 2.08E+03 | 9.70E+03 | 3.40E+04 | 9.77E+04 | 1.57E+05 | 2.43E+05 |
| <b>i1'</b>  | <b>p1'</b>                              | 3.30E-02                               | 3.17E-01 | 1.97E+00 | 9.15E+00 | 3.45E+01 | 1.11E+02 | 1.89E+02 | 3.14E+02 |
| <b>i5'</b>  | <b>i6'</b>                              | 3.30E+04                               | 5.36E+04 | 8.35E+04 | 1.25E+05 | 1.82E+05 | 2.58E+05 | 3.04E+05 | 3.57E+05 |
| <b>i6'</b>  | <b>i5'</b>                              | 3.19E+08                               | 4.96E+08 | 7.39E+08 | 1.07E+09 | 1.49E+09 | 2.04E+09 | 2.36E+09 | 2.72E+09 |
| <b>i5'</b>  | <b>p2'</b>                              | 1.98E-04                               | 4.37E-03 | 4.38E-02 | 2.81E-01 | 1.35E+00 | 5.25E+00 | 9.72E+00 | 1.74E+01 |
| <b>i6'</b>  | <b>p3'</b>                              | 1.89E+05                               | 4.36E+05 | 9.19E+05 | 1.80E+06 | 3.31E+06 | 5.79E+06 | 7.52E+06 | 9.67E+06 |
| <b>i2'</b>  | <b>p4'</b>                              | 1.17E-04                               | 6.11E-03 | 1.14E-01 | 1.04E+00 | 6.03E+00 | 2.61E+01 | 5.01E+01 | 9.17E+01 |
| <b>i2'</b>  | <b>p6'</b>                              | 2.15E-14                               | 2.20E-08 | 8.42E-04 | 6.01E-02 | 8.99E-01 | 6.91E+00 | 1.64E+01 | 3.61E+01 |
| <b>i7'</b>  | <b>p5'</b>                              | 1.25E+03                               | 7.68E+03 | 3.21E+04 | 1.04E+05 | 2.83E+05 | 6.74E+05 | 9.98E+05 | 1.45E+06 |
| <b>i4'</b>  | <b>i8'</b>                              | 3.82E+10                               | 4.97E+10 | 6.34E+10 | 7.95E+10 | 9.80E+10 | 1.19E+11 | 1.31E+11 | 1.43E+11 |
| <b>i8'</b>  | <b>i4'</b>                              | 7.02E+09                               | 9.06E+09 | 1.15E+10 | 1.42E+10 | 1.74E+10 | 2.10E+10 | 2.30E+10 | 2.50E+10 |
| <b>i4'</b>  | <b>i3'</b>                              | 1.81E+03                               | 4.30E+03 | 9.32E+03 | 1.86E+04 | 3.50E+04 | 6.21E+04 | 8.12E+04 | 1.05E+05 |
| <b>i3'</b>  | <b>i4'</b>                              | 3.81E+05                               | 7.04E+05 | 1.24E+06 | 1.95E+06 | 2.99E+06 | 4.41E+06 | 5.28E+06 | 6.27E+06 |
| <b>i4'</b>  | <b>i10'</b>                             | 7.24E-07                               | 3.14E-05 | 3.71E-04 | 2.53E-03 | 1.23E-02 | 4.78E-02 | 8.80E-02 | 1.56E-01 |
| <b>i10'</b> | <b>i4'</b>                              | 5.54E+00                               | 1.66E+02 | 1.40E+03 | 6.99E+03 | 2.56E+04 | 7.58E+04 | 1.23E+05 | 1.93E+05 |
| <b>i4'</b>  | <b>p7'</b>                              | 9.35E-04                               | 1.65E-02 | 1.48E-01 | 8.80E-01 | 3.99E+00 | 1.48E+01 | 2.62E+01 | 4.72E+01 |
| <b>i4'</b>  | <b>p12'</b>                             | 2.13E+02                               | 9.54E+02 | 3.45E+03 | 1.07E+04 | 2.87E+04 | 7.00E+04 | 1.06E+05 | 1.57E+05 |

|             |             |          |          |          |          |          |          |          |          |
|-------------|-------------|----------|----------|----------|----------|----------|----------|----------|----------|
| <b>i8'</b>  | <b>i9'</b>  | 4.59E+04 | 7.76E+04 | 1.25E+05 | 1.93E+05 | 2.88E+05 | 4.16E+05 | 4.96E+05 | 5.86E+05 |
| <b>i9'</b>  | <b>i8'</b>  | 8.52E+07 | 1.41E+08 | 2.21E+08 | 3.35E+08 | 4.90E+08 | 6.96E+08 | 8.22E+08 | 9.64E+08 |
| <b>i8'</b>  | <b>p8'</b>  | 1.37E-08 | 2.11E-07 | 3.18E-06 | 3.71E-05 | 2.96E-04 | 1.71E-03 | 3.74E-03 | 7.73E-03 |
| <b>i8'</b>  | <b>p13'</b> | 4.47E+00 | 2.60E+01 | 1.14E+02 | 4.07E+02 | 1.24E+03 | 3.36E+03 | 5.32E+03 | 8.23E+03 |
| <b>i9'</b>  | <b>p3'</b>  | 1.91E+05 | 4.43E+05 | 9.38E+05 | 1.84E+06 | 3.40E+06 | 5.95E+06 | 7.74E+06 | 9.95E+06 |
| <b>i3'</b>  | <b>p9'</b>  | 1.27E-03 | 5.95E-02 | 8.39E-01 | 6.26E+00 | 3.18E+01 | 1.24E+02 | 2.28E+02 | 4.02E+02 |
| <b>i3'</b>  | <b>p11'</b> | 1.14E-09 | 2.04E-04 | 5.95E-02 | 1.39E+00 | 1.33E+01 | 7.87E+01 | 1.70E+02 | 3.45E+02 |
| <b>i10'</b> | <b>p10'</b> | 1.26E+03 | 8.18E+03 | 3.54E+04 | 1.18E+05 | 3.25E+05 | 7.83E+05 | 1.17E+06 | 1.70E+06 |
